# Supplementary material for: Aging of Xenopus tropicalis Eggs Leads to Deadenylation of a Specific Set of Maternal mRNAs and Loss of Developmental Potential
Source: PubMed Central journal article supplement (PMC2962626; doi:10.1371/journal.pone.0013532), 2010-10-22
Supplement: pone.0013532.s004.pdf [file pone.0013532.s004.pdf]

**Table S1: Transcripts probed by qRT-PCR.**

For each mRNA the sequences of the forward (F) and reverse (R) primers are indicated. Ref-Seq transcript ID and gene title was obtained using the annotation version na30 November 23, 2009 provided by Affymetrix via the corresponding Affymetrix probeset ID. MGC75766 and eno1 are transcripts reported to be deadenylated at maturation as well after fertilization (1) and are thus listed in category 8 (Table S3).

| mRNA         |   | Sequences 5' - 3'     | Ref-Seq transcript ID | Gene Title                                                                                                                           | Affymetrix probeset ID |
|--------------|---|-----------------------|-----------------------|--------------------------------------------------------------------------------------------------------------------------------------|------------------------|
| tpi1         | F | ATCAACGCCAAGCAATAACC  | NM_001114234          | triosephosphate isomerase 1                                                                                                          | Str.52176.1.S1_at      |
|              | R | GGCCGCGTCACTTATTCTAA  |                       |                                                                                                                                      |                        |
| atp5a1       | F | TGGAAAGATCTCCGAACAGG  | NM_001030439          | atp5a1 protein                                                                                                                       | Str.2749.1.S1_at       |
|              | R | AAACTGGTGGCAGAAAAACG  |                       |                                                                                                                                      |                        |
| MGC75766     | F | AAAAGGAGAGCATTGCCAAA  | NM_203787             | ATP synthase subunit B                                                                                                               | Str.27670.1.S1_at      |
|              | R | GACAGATGGAGCCTGCAGAT  |                       |                                                                                                                                      |                        |
| TGas042k20.1 | F | CTTGGTACGTCCCAGTTTGG  | NM_203811             | hydroxyacyl-Coenzyme A dehydrogenase/3-ketoacyl-Coenzyme A thiolase/enoyl-Coenzyme A hydratase (trifunctional protein), beta subunit | Str.20522.1.S1_s_at    |
|              | R | CAAATCGAAACAGACGAGCA  |                       |                                                                                                                                      |                        |
| TGas064h09.1 | F | TGTGGCCAAACAAACAAAGA  | NM_001016551          | prohibitin 2                                                                                                                         | Str.1047.1.S1_at       |
|              | R | GTCAAACAGGGAAGGGAACA  |                       |                                                                                                                                      |                        |
| slc34a2      | F | TTGCTGGGAATGATCTGATG  | NM_203971             | solute carrier family 34 (sodium phosphate), member 2                                                                                | Str.27160.3.S1_a_at    |
|              | R | CGGGGCAGTTTTATTTTCAGA |                       |                                                                                                                                      |                        |
| eif3s9       | F | CCTGCTGGATCATCTTGTGA  | NM_001016724          | eukaryotic translation initiation factor 3, subunit 9 eta, 116kDa                                                                    | Str.6777.1.S1_at       |
|              | R | CGCTGCTTCATTGCTATTCA  |                       |                                                                                                                                      |                        |
| pelo         | F | AGTCAAGCTCCGACGATGAT  | NM_001004823          | pelota homolog                                                                                                                       | Str.15516.1.S1_a_at    |
|              | R | CTATTTCTTTGCCCGGTGAC  |                       |                                                                                                                                      |                        |
| tubb2c       | F | GAAGGGGAAGAGGAGGAAAA  | NM_001078982          | tubulin, beta 2C                                                                                                                     | Str.8814.1.S1_x_at     |
|              | R | TGAAACCGGAGAGAGAAGGA  |                       |                                                                                                                                      |                        |
| sdhb         | F | GGCGACGTACAAGGAGAGAG  | NM_001126528          | succinate dehydrogenase [ubiquinone] iron-sulfur subunit, mitochondrial                                                              | StrEns.9993.1.S1_at    |
|              | R | CGGAAGTGCGTAGAATCACA  |                       |                                                                                                                                      |                        |
| TNeu126i07.1 | F | ATGGGATCACATCAAGCACA  | NM_001044430          | ubiquinol-cytochrome c reductase complex (7.2 kD) (ucrc)                                                                             | Str.52223.1.S1_at      |
|              | R | CCTTGGATGAAGTGCCAGTC  |                       |                                                                                                                                      |                        |
| mrpl22       | F | AGCCGTACGGAATCACAATG  | NM_001079446          | mitochondrial ribosomal protein L22                                                                                                  | Str.17424.1.S1_at      |
|              | R | CATGCCACGTCCATGATAAC  |                       |                                                                                                                                      |                        |
| LOC394441    | F | CTGTGTCCGGGAATGAAGAT  | NM_203519             | egg cortical granule lectin                                                                                                          | Str.115.1.S1_at        |
|              | R | AGGGTCAGCTTCTGGGAAAT  |                       |                                                                                                                                      |                        |

|              |   |                          |              |                                              |                   |
|--------------|---|--------------------------|--------------|----------------------------------------------|-------------------|
| eno1         | F | CTCTCCCAGCATAACCTTGC     | NM_203813    | enolase 1, (alpha)                           | Str.5337.1.S1_at  |
|              | R | CTACATGCAGGCACCAGTGT     |              |                                              |                   |
| TEgg053p21.1 | F | AACATAAAATCAAGCAACTTTCCA | NM_001004842 | MAD2 mitotic arrest deficient-like 2 (yeast) | Str.12948.1.S2_at |
|              | R | GGATAGGCAGAAACTGCTTTC    |              |                                              |                   |
| nop5         | F | GAAGAACCTTCCACCAGCAC     | NM_203967    | nucleolar protein 5                          | Str.2215.1.S1_at  |
|              | R | TTTCTTTCCTACTCATCATCCTCC |              |                                              |                   |
| odc1         | F | GACTGTGAGATGGGGTCACA     | NM_001005441 | ornithine decarboxylase 1                    | Str.6672.1.S1_at  |
|              | R | CACAAGCTACAAATGCTTGAGTG  |              |                                              |                   |

1. Graindorge A, Thuret R, Pollet N, Osborne HB, Audic Y (2006) Identification of post-transcriptionally regulated *Xenopus tropicalis* maternal mRNAs by microarray. *Nucleic Acids Res.* 34, 986-995.
