# Supplementary material for: Aging of Xenopus tropicalis Eggs Leads to Deadenylation of a Specific Set of Maternal mRNAs and Loss of Developmental Potential
Source: PubMed Central journal article supplement (PMC2962626; doi:10.1371/journal.pone.0013532), 2010-10-22
Supplement: pone.0013532.s005.pdf [file pone.0013532.s005.pdf]

**Table S2: Regulatory elements searched in 3'UTR.**

Sequences of the regulatory elements CPE, PAS and ARE used for in silico analysis were obtained from the databases UTR-site (<http://www2.ba.itb.cnr.it/UTRSite/>)(1) and Transterm (<http://uther.otago.ac.nz/>)(2) and from motif analysis reported elsewhere (3).

| Regulatory element   | Motif sequence           | Reference |
|----------------------|--------------------------|-----------|
| <b>CPE</b>           | UUUUUAAU                 | 1         |
|                      | UUUUUUAU                 | 1         |
|                      | UUUUAAUU                 | 3         |
|                      | UUUUAAU                  | 3         |
|                      | UUUUUUAU                 | 3         |
|                      | UUUUUAU                  | 2         |
| <b>canonical PAS</b> | AAUAAA                   | 1         |
|                      | AUUAAA                   | 1         |
|                      | AGUAAA                   | 1         |
|                      | UAUAAA                   | 1         |
|                      | CAUAAA                   | 1         |
|                      | GAUAAA                   | 1         |
|                      | AAUUAU                   | 1         |
|                      | AAUACA                   | 1         |
|                      | AAUAGA                   | 1         |
|                      | AAUGAA                   | 1         |
|                      | ACUAAA                   | 1         |
|                      | AACAAA                   | 1         |
|                      | UUUAAA                   | 1         |
|                      | <b>non-canonical PAS</b> | UUUUUUUU  |
| UUUUUUUU             |                          | 3         |
| UUUUUUUU             |                          | 2         |
| UUUUUUUU             |                          | 2         |
| UUUUUUUU             |                          | 2         |
| UUUUUUUU             |                          | 2         |
| <b>ARE</b>           | UUUUUUUU                 | 3         |
|                      | UUUUUUUU                 | 3         |
|                      | UUUUUUUU                 | 2         |
|                      | UUUUUUUU                 | 2         |
|                      | UUUUUUUU                 | 2         |
|                      | UUUUUUUU                 | 2         |

1. Mignone F, et al. (2005) UTRdb and UTRsite: a collection of sequences and regulatory motifs of the untranslated regions of eukaryotic mRNAs. *Nucleic Acids Res.* 33, D141-D146.

2. Jacobs GH, et al. (2009) Transterm: a database to aid the analysis of regulatory sequences in mRNAs. *Nucleic Acids Res.* 37, D72-D76.

3. Graindorge A, Thuret R, Pollet N, Osborne HB and Audic Y (2006). Identification of post-transcriptionally regulated *Xenopus tropicalis* maternal mRNAs by microarray. *Nucleic Acids Res.* 34, 986-995.
