# Supplementary material for: Aging of Xenopus tropicalis Eggs Leads to Deadenylation of a Specific Set of Maternal mRNAs and Loss of Developmental Potential
Source: PubMed Central journal article supplement (PMC2962626; doi:10.1371/journal.pone.0013532), 2010-10-22
Supplement: pone.0013532.s006.pdf [file pone.0013532.s006.pdf]

**Table S3: Probesets with decreased signal assigned to the categories with differential adenylation behaviour**

All probe sets with decreased signal upon aging are listed according to the adenylation behavior categories as defined (1). Category 7 is not included, since there has no sequence been reported in this category. The annotated gene symbol and gene title are given as available in the Affymetrix annotation file na30 November 23, 2009.

(1) Graindorge A, Thuret R, Pollet N, Osborne HB and Audic Y (2006). Identification of post-transcriptionally regulated *Xenopus tropicalis* maternal mRNAs by microarray. *Nucleic Acids Res.* 34, 986-995.

**Category 1 (maturation: depolyadenylated, fertilization: constant)**

(71 of 135 decreased)

| <i>Probe Set</i>    | <i>Gene Symbol</i> | <i>Gene Title</i>                                               |
|---------------------|--------------------|-----------------------------------------------------------------|
| Str.823.1.S1_at     | aco2               | aconitase 2, mitochondrial                                      |
| Str.4269.1.S1_at    | aldh9a1            | aldehyde dehydrogenase 9 family, member A1                      |
| Str.6670.1.S1_at    | aldoa              | aldolase A, fructose-bisphosphate                               |
| Str.648.1.S1_at     | arl2               | ADP-ribosylation factor-like 2                                  |
| Str.37821.2.S1_a_at | birc4              | birc4 protein                                                   |
| Str.6989.1.S1_at    | c3orf37            | chromosome 3 open reading frame 37                              |
| Str.1698.1.S1_at    | ccdc103            | coiled-coil domain containing 103                               |
| Str.10998.1.S1_at   | cndp2              | CNDP dipeptidase 2 (metallopeptidase M20 family)                |
| Str.4820.1.S1_at    | eef1a1o            | eukaryotic translation elongation factor 1 alpha 1, oocyte form |
| Str.47229.1.A1_x_at | eef1a1o            | eukaryotic translation elongation factor 1 alpha 1, oocyte form |
| Str.8415.1.S1_at    | eif3l              | eukaryotic translation initiation factor 3, subunit L           |
| Str.27072.2.S1_at   | epc1               | Enhancer of polycomb homolog 1                                  |
| Str.27072.1.S1_at   | epc1               | enhancer of polycomb homolog 1                                  |
| Str.5017.1.S1_at    | exosc2             | exosome component 2                                             |
| Str.6679.1.S1_at    | g3bp2              | GTPase activating protein (SH3 domain) binding protein 2        |
| Str.1620.1.S1_at    | gamt               | guanidinoacetate N-methyltransferase                            |
| Str.8069.1.S1_at    | gapdh              | glyceraldehyde-3-phosphate dehydrogenase                        |
| AFFX-Str-gapdh-M_at | gapdh              | glyceraldehyde-3-phosphate dehydrogenase                        |
| AFFX-Str-gapdh-5_at | gapdh              | glyceraldehyde-3-phosphate dehydrogenase                        |
| AFFX-Str-gapdh-3_at | gapdh              | glyceraldehyde-3-phosphate dehydrogenase                        |
| Str.8025.1.S1_a_at  | krt18              | keratin 18                                                      |
| Str.8680.1.S1_at    | ldhb               | lactate dehydrogenase B                                         |
| Str.1431.1.S1_at    | LOC100124857       | hypothetical protein LOC100124857                               |
| Str.22053.1.S1_at   | LOC100125021       | hypothetical protein LOC100125021                               |
| Str.2314.1.S1_at    | LOC100125169       | Hypothetical protein LOC100125169                               |
| Str.18325.1.A1_at   | LOC100127637       | hypothetical protein LOC100127637                               |
| Str.15051.1.S1_at   | LOC100135217       | Hypothetical protein LOC100135217                               |
| Str.1340.2.S1_at    | LOC100145083       | hypothetical protein LOC100145083                               |
| Str.21798.1.S1_at   | LOC100216164       | hypothetical protein LOC100216164                               |
| Str.11945.1.S1_at   | LOC496692          | hypothetical LOC496692                                          |
| Str.22124.1.S1_at   | LOC496785          | hypothetical LOC496785                                          |
| Str.17221.1.S1_at   | LOC549152          | hypothetical protein LOC549152                                  |
| Str.21546.1.S1_at   | LOC549289          | hypothetical protein LOC549289                                  |
| Str.3137.1.S1_at    | LOC549492          | hypothetical protein LOC549492                                  |
| Str.84.1.S1_at      | mdh1               | malate dehydrogenase 1, NAD (soluble)                           |
| Str.6413.1.S1_a_at  | MGC69505           | MGC69505 protein                                                |
| Str.287.1.S1_at     | MGC75803           | hypothetical protein MGC75803                                   |
| Str.710.1.S1_at     | MGC75949           | hypothetical protein MGC75949                                   |

|                     |                  |                                                                                                   |
|---------------------|------------------|---------------------------------------------------------------------------------------------------|
| Str.830.1.S1_at     | MGC75970         | hypothetical protein MGC75970                                                                     |
| Str.6893.1.S1_at    | MGC76063         | COP9 signalosome subunit 5                                                                        |
| Str.20889.1.S1_s_at | MGC76063         | COP9 signalosome subunit 5                                                                        |
| Str.6796.1.S1_at    | MGC76097         | carnitine/acylcarnitine translocase                                                               |
| Str.24372.1.S1_s_at | MGC79787         | MGC79787 protein                                                                                  |
| Str.52165.1.S1_s_at | MGC89973         | MGC89973 protein                                                                                  |
| Str.1295.1.S1_at    | MGC89973         | MGC89973 protein                                                                                  |
| Str.1362.1.S1_a_at  | MGC97811         | MGC97811 protein                                                                                  |
| Str.11979.1.S1_at   | mrpl23           | mitochondrial ribosomal protein L23                                                               |
| Str.10186.1.S1_at   | ndufv2           | NADH dehydrogenase (ubiquinone) flavoprotein 2, 24kDa                                             |
| Str.1896.1.S2_at    | nola2            | nucleolar protein family A, member 2                                                              |
| Str.11112.1.S1_at   | oprs1            | oprs1 protein                                                                                     |
| Str.6228.1.S1_at    | pcna             | pcna protein                                                                                      |
| Str.7593.1.S1_at    | psma7            | proteasome (prosome, macropain) subunit, alpha type 7                                             |
| Str.13591.1.S1_at   | psmb1            | proteasome (prosome, macropain) subunit, beta type, 1                                             |
| Str.1435.1.S1_at    | psmd13           | proteasome (prosome, macropain) 26S subunit, non-ATPase, 13                                       |
| Str.17153.1.A1_a_at | rbbp7            | retinoblastoma binding protein 7                                                                  |
| Str.51721.1.S1_at   | rbpms2           | RNA binding protein with multiple splicing 2                                                      |
| Str.6969.1.S1_at    | rps6             | ribosomal protein S6                                                                              |
| Str.2049.3.S1_a_at  | slc25a3          | solute carrier family 25 (mitochondrial carrier; phosphate carrier), member 3                     |
| Str.2049.2.S1_a_at  | slc25a3          | solute carrier family 25 (mitochondrial carrier; phosphate carrier), member 3                     |
| Str.27202.1.S1_at   | smarca5          | SWI/SNF related, matrix associated, actin dependent regulator of chromatin, subfamily a, member 5 |
| Str.9957.1.S1_at    | spop             | speckle-type POZ protein                                                                          |
| Str.9533.2.S1_a_at  | sppl3            | signal peptide peptidase 3                                                                        |
| Str.290.1.S1_s_at   | TEgg033f08.1     | MGC69396 protein                                                                                  |
| Str.10791.1.S1_at   | TEgg046m03.1     | F-box protein 5                                                                                   |
| Str.10339.1.S1_s_at | TGas057c05.1     | replication protein A1, 70kDa                                                                     |
| Str.1047.1.S1_at    | TGas064h09.1     | prohibitin 2                                                                                      |
| Str.1679.1.S1_a_at  | TNeu089n18.1     | ribosomal protein S23                                                                             |
| Str.8172.1.S1_at    | TNeu104f20.1 /// | UPF0585 protein C16orf13 homolog ///                                                              |
| Str.7616.1.S1_at    | wfikkn1          | WAP, follistatin/kazal, immunoglobulin, kunitz and netrin domain containing 1                     |
| Str.3011.1.S1_at    | trnt1            | tRNA nucleotidyl transferase, CCA-adding, 1                                                       |
| Str.3286.1.S1_at    | tsta3            | tissue specific transplantation antigen P35B                                                      |
| Str.3286.1.S1_at    | TPpA010e06.1     | peroxiredoxin 2                                                                                   |

### Category 2 (maturation: polyadenylated, fertilization: constant)

(9 of 54 decreased)

| <i>Probe Set</i>    | <i>Gene Symbol</i> | <i>Gene Title</i>                                      |
|---------------------|--------------------|--------------------------------------------------------|
| Str.9724.1.S1_at    | aifm1              | apoptosis-inducing factor, mitochondrion-associated, 1 |
| Str.5809.1.S1_at    | capn1              | calpain 1, (mu/l) large subunit                        |
| Str.14315.1.A1_a_at | LOC100144949       | hypothetical protein LOC100144949                      |
| Str.5645.1.S1_at    | MGC107795          | MGC107795 protein                                      |
| Str.50662.1.A1_s_at | MGC107795          | MGC107795 protein                                      |
| Str.50662.1.A1_x_at | MGC107795          | MGC107795 protein                                      |
| Str.27234.1.S2_a_at | MGC76214           | hypothetical protein MGC76214                          |
| Str.286.1.S2_at     | TGas142e24.1       | high-mobility group 20A                                |
| Str.5927.1.S2_at    | ube2h              | ubiquitin-conjugating enzyme E2H (UBC8 homolog)        |

### Category 3 (maturation: constant, fertilization: polyadenylated)

(6 of 18 decreased)

| <i>Probe Set</i>  | <i>Gene Symbol</i> | <i>Gene Title</i>                                       |
|-------------------|--------------------|---------------------------------------------------------|
| Str.10827.1.S2_at | capza2             | capping protein (actin filament) muscle Z-line, alpha 2 |
| Str.10827.1.S1_at | capza2             | capping protein (actin filament) muscle Z-line, alpha 2 |

|                   |           |                                                                |
|-------------------|-----------|----------------------------------------------------------------|
| Str.5921.1.S1_at  | e2f3      | E2F transcription factor 3                                     |
| Str.10770.1.S1_at | LOC779588 | hypothetical protein LOC779588                                 |
| Str.299.1.S1_at   | timm13    | translocase of inner mitochondrial membrane 13 homolog (yeast) |
| Str.11786.1.A1_at | znf574    | zinc finger protein 574                                        |

**Category 4 (maturation: polyadenylated, fertilization: depolyadenylated)**

(3 of 22 decreased)

| <i>Probe Set</i>   | <i>Gene Symbol</i> | <i>Gene Title</i>                                                                  |
|--------------------|--------------------|------------------------------------------------------------------------------------|
| Str.8413.1.S1_at   | atic               | 5-aminoimidazole-4-carboxamide ribonucleotide formyltransferase/IMP cyclohydrolase |
| Str.15861.1.S1_at  | rabep1             | rabaptin, RAB GTPase binding effector protein 1                                    |
| Str.1679.1.S1_a_at | TNeu089n18.1       | ribosomal protein S23                                                              |

**Category 5 (maturation: constant, fertilization: depolyadenylated)**

(14 of 33 decreased)

| <i>Probe Set</i>    | <i>Gene Symbol</i> | <i>Gene Title</i>                    |
|---------------------|--------------------|--------------------------------------|
| Str.27623.1.S1_at   | adrm1              | adhesion regulating molecule 1       |
| Str.1620.1.S1_at    | gamt               | guanidinoacetate N-methyltransferase |
| Str.15297.1.S1_at   | grhpr              | grhpr protein                        |
| Str.37852.3.A1_a_at | LOC100145798       | hypothetical protein LOC100145798    |
| Str.5678.1.S1_a_at  | LOC447981          | hypothetical protein LOC447981       |
| Str.1999.1.S1_at    | LOC549006          | hypothetical protein LOC549006       |
| Str.20792.1.S1_at   | LOC733864          | hypothetical protein LOC733864       |
| Str.6067.1.S1_at    | MGC75699           | ribosomal protein S3                 |
| Str.989.1.S1_at     | MGC76130           | hypothetical protein MGC76130        |
| Str.1295.1.S1_at    | MGC89973           | MGC89973 protein                     |
| Str.52165.1.S1_s_at | MGC89973           | MGC89973 protein                     |
| Str.15833.1.S1_at   | prdx3              | prdx3 protein                        |
| Str.24756.1.S1_at   | TGas028n11.1       | formiminotransferase cyclodeaminase  |
| Str.6150.1.A1_at    | vdac2              | voltage-dependent anion channel 2    |

**Category 6 (maturation: depolyadenylated, fertilization: polyadenylated)**

(28 of 50 decreased)

| <i>Probe Set</i>    | <i>Gene Symbol</i> | <i>Gene Title</i>                                                                             |
|---------------------|--------------------|-----------------------------------------------------------------------------------------------|
| Str.11896.2.S1_at   | ---                | ---                                                                                           |
| Str.10460.1.S1_at   | agpat4             | 1-acylglycerol-3-phosphate O-acyltransferase 4 (lysophosphatidic acid acyltransferase, delta) |
| Str.10583.2.S1_at   | brca1              | breast cancer 1, early onset                                                                  |
| Str.1811.1.S1_at    | cdk9               | cyclin-dependent kinase 9                                                                     |
| Str.6567.1.S1_at    | cfl1               | cofilin 1 (non-muscle)                                                                        |
| Str.6885.1.S1_at    | cox5a              | cytochrome c oxidase, subunit Va                                                              |
| Str.22110.1.S1_at   | LOC100170577       | hypothetical protein LOC100170577                                                             |
| Str.24802.1.S1_at   | LOC548854          | hypothetical protein LOC548854                                                                |
| Str.15407.1.S1_at   | lsm1               | LSM1 homolog, U6 small nuclear RNA associated (S. cerevisiae)                                 |
| Str.16611.1.S1_at   | MGC107838          | MGC107838 protein                                                                             |
| Str.6205.1.S1_at    | MGC75715           | hypothetical protein MGC75715                                                                 |
| Str.6205.1.S2_at    | MGC75715           | hypothetical protein MGC75715                                                                 |
| Str.4770.1.S1_at    | MGC75981           | Hypothetical protein MGC75981                                                                 |
| Str.1276.1.S1_at    | MGC76019           | hypothetical protein MGC76019                                                                 |
| Str.27671.1.S1_a_at | MGC76078           | N-acetyltransferase 5                                                                         |
| Str.10709.1.S1_at   | MGC89693           | MGC89693 protein                                                                              |
| Str.24766.1.S1_at   | pdlim1             | PDZ and LIM domain 1 (elfin)                                                                  |
| Str.6229.1.A1_at    | pou5f1.1           | POU class 5 homeobox 1, gene 1                                                                |
| Str.6646.1.S1_at    | rnf121             | ring finger protein 121                                                                       |

|                    |              |                                            |
|--------------------|--------------|--------------------------------------------|
| Str.1730.1.S1_at   | ruvbl2       | RuvB-like 2                                |
| Str.1730.1.S1_a_at | ruvbl2       | RuvB-like 2                                |
| Str.524.1.S2_at    | snip1        | Smad nuclear interacting protein 1         |
| Str.492.1.S1_a_at  | surf4        | surfeit gene 4                             |
| Str.6655.1.S1_at   | TEgg054b02.1 | mitochondrial outer membrane protein TOM40 |
| Str.286.1.S2_at    | TGas142e24.1 | high-mobility group 20A                    |
| Str.17179.1.S1_at  | tk1          | thymidine kinase 1, soluble                |
| Str.3387.1.S2_at   | tmpo         | thymopoietin                               |
| Str.17226.1.S1_at  | xylt2        | xylosyltransferase II                      |

**Category 8 (maturation: depolyadenylated, fertilization: depolyadenylated)**

(15 of 17 decreased)

| <i>Probe Set</i>    | <i>Gene Symbol</i> | <i>Gene Title</i>                          |
|---------------------|--------------------|--------------------------------------------|
| Str.5646.1.S1_at    | arbp               | acidic ribosomal phosphoprotein P0         |
| Str.24243.1.S1_at   | cks1b              | CDC28 protein kinase regulatory subunit 1B |
| Str.5337.1.S1_at    | eno1               | enolase 1, (alpha)                         |
| Str.9960.1.S1_at    | fkbp6              | FK506 binding protein 6                    |
| Str.1869.1.S1_at    | gyg1               | glycogenin 1                               |
| Str.1374.1.S1_s_at  | LOC549795          | hypothetical protein LOC549795             |
| Str.1374.1.S1_x_at  | LOC549795          | hypothetical protein LOC549795             |
| Str.27670.1.S1_at   | MGC75766           | ATP synthase subunit B                     |
| Str.1295.1.S1_at    | MGC89973           | MGC89973 protein                           |
| Str.52165.1.S1_s_at | MGC89973           | MGC89973 protein                           |
| Str.1295.1.S1_at    | MGC89973           | MGC89973 protein                           |
| Str.9100.1.S1_a_at  | TGas044118.1       | 60S ribosomal protein L35                  |
| Str.9100.3.S1_a_at  | TGas044118.1       | 60S ribosomal protein L35                  |
| Str.1679.1.S1_a_at  | TNeu089n18.1       | ribosomal protein S23                      |
| Str.6703.1.S1_at    | TNeu119p20.1       | ribosomal protein SA                       |
