# Supplementary material for: Aging of Xenopus tropicalis Eggs Leads to Deadenylation of a Specific Set of Maternal mRNAs and Loss of Developmental Potential
Source: PubMed Central journal article supplement (PMC2962626; doi:10.1371/journal.pone.0013532), 2010-10-22
Supplement: pone.0013532.s007.pdf [file pone.0013532.s007.pdf]

**Table S4: Oligos used for RL-PAT**

The ligated primer P1 is modified by a 5' phosphate and 3' amino group. The complementary P'1 primer was used for reverse transcription and as reverse primer in PCR. Gene specific forward primers are indicated for each analyzed transcript. Ref-Seq transcript ID was obtained using the annotation version na30 November 23, 2009 provided by Affymetrix via the corresponding Affymetrix probeset ID.

| <b>mRNA</b>  | <b>Sequences 5' - 3'</b>              | <b>Ref-Seq transcript ID</b> |
|--------------|---------------------------------------|------------------------------|
| P1           | P-GGTCACCTTGATCTGAAGC-NH <sub>2</sub> |                              |
| P'1          | GCTTCACATCAAGGTGACCTTTTT              |                              |
| atp5a1       | TGAAAAGATCTCCGAACAGG                  | NM_001030439                 |
| tpi1         | ATCAACGCCAAGCAATAACC                  | NM_203787                    |
| eif3s9       | CCTGCTGGATCATCTTGTGA                  | NM_001016724                 |
| grhpr        | AAGCAGCATGACATCTAATGGA                | NM_001007895                 |
| odc1         | GACTGTGAGATGGGGTCACA                  | NM_001005441                 |
| melk         | TCCTCTCTGATTCACATGGTGT                | NM_001016390                 |
| TEgg053p21.1 | AACATAAAATCAAGCAACTTTCCA              | NM_001004842                 |
| nop5         | AGACTCACAATGACTCTTTAGCATAAACC         | NM_203967                    |
| tmem85       | TTGGCATTAGCTGTCTACAAGTG               | NM_203545                    |
